# Supplementary material for: Mismatch between Bioluminescence Imaging (BLI) and MRI When Evaluating Glioblastoma Growth: Lessons from a Study Where BLI Suggested “Regression” while MRI Showed “Progression”
Source: MDPI journal article supplement (doi:10.3390/cancers15061919), 2023-03-22
Supplement: s1 [file s1]

# Mismatch between bioluminescence imaging (BLI) and MRI when evaluating glioblastoma growth. Lessons from a study where BLI suggested “regression” while MRI showed “progression”

Mathilde Bausart <sup>1, #</sup>, Elia Bozzato <sup>1, #</sup>, Nicolas Joudiou <sup>2</sup>, Xanthippi Koutsoumpou <sup>3</sup>, Bella Manshian <sup>3</sup>,  
Véronique Pr  at <sup>1,\*, †</sup> and Bernard Gallez <sup>4,\*, †</sup>.

## Supplementary Material

### Supplementary Methods

#### *Viral vector production*

Viral vectors were engineered and produced by the Leuven Viral Vector Core (LVVC) as previously described [1]. Briefly, HIV-based SIN (self-inactivating) lentiviral vectors were produced by triple transient transfection of 293T producer cells. A VSV-G envelop encoding plasmid, a packaging plasmid together with the pCH-EF1a-eGFP-T2A-Luc2-Ires-Puro transfer plasmid were transfected using polyethylenimine (PEI; Polysciences, Amsterdam, The Netherlands). After collecting the supernatant, the medium was filtered using a 0.45 µm filter (Corning Inc., Senefte, Belgium) and concentrated using a Vivaspın 50,000MW column (Vivascience, Bornem, Belgium). The resulting LV\_EF1a-eGFP-T2A-Luc2-Ires-Puro viral vector containing concentrate was aliquoted and stored at -80 °C. After transduction, cells were treated with puromycin, sorted and single cell cloning performed. An example of single selection for the GL261-luc-GFP cells is provided in Fig. S1.

1. Ibrahim, A.; Velde, G.V.; Reumers, V.; Toelen, J.; Thiry, I.; Vandeputte, C.; Vets, S.; Deroose, C.; Bormans, G.; Baekelandt, V.; et al. Highly Efficient Multicistronic Lentiviral Vectors with Peptide 2A Sequences. *Hum. Gene Ther.* **2009**, 20, 845–860, doi:10.1089/hum.2008.188.

Supplementary figures

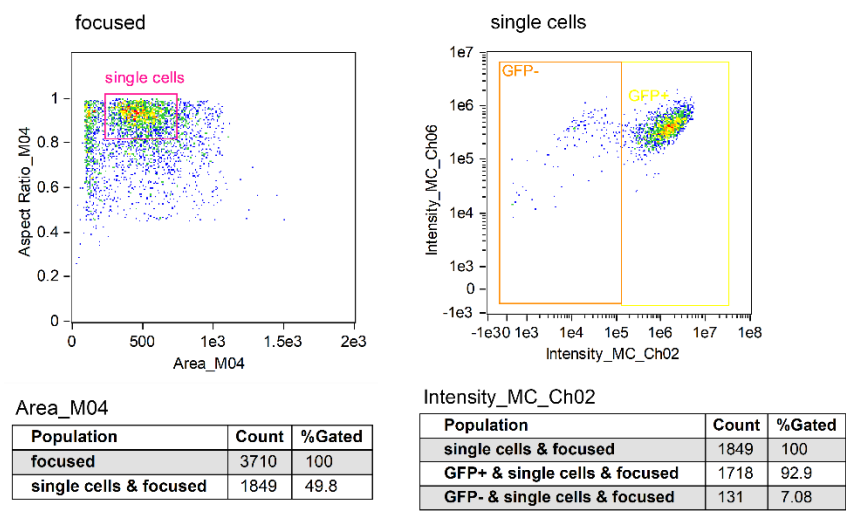

**Figure S1.** Flow cytometry data analysis/FACS purification of GL261-luc-GFP cells used in the present study

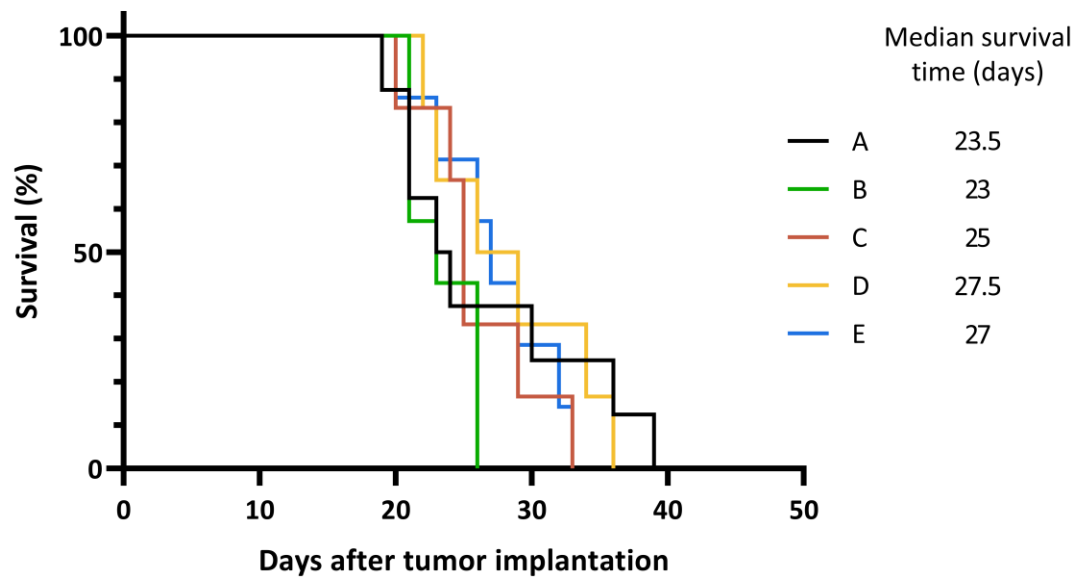

**Figure S2.** Survival curves of untreated mice bearing GL261 tumors. The graph gathers the results of five independent experiments (n=6-8) named from A to E. For these experiments, C57Bl/6J mice were orthotopically grafted with  $1.3 \times 10^5$  GL261 cells, and then, the survival was assessed. Statistical analyses of survival curves were performed using the Mantel-Cox test and showed no difference between the curves.

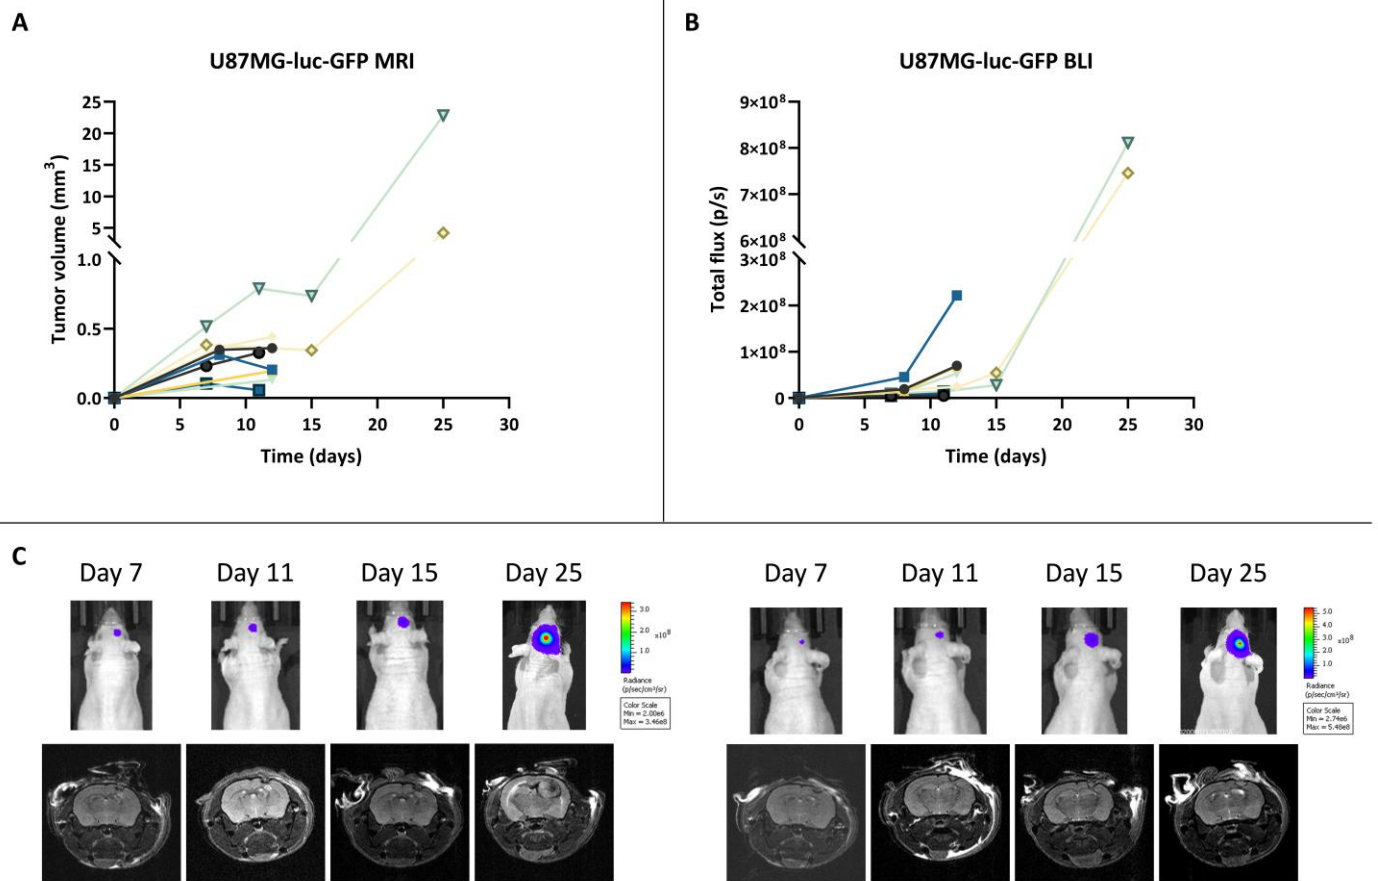

**Figure S3.** Tumor growth of the U87MG-luc-GFP model. (A) Evolution of tumor volumes measured by MRI (day 7-8 and day 11-12:  $n=9$ ; days 15 and 25:  $n=2$ ). (B) Evolution of total flux measured by BLI (day 7-8 and day 11-12:  $n=9$ ; days 15 and 25:  $n=2$ ). (C) Representative images of U87MG-luc-GFP tumor growth. Note that BLI and MRI results are consistent. The correlation between light flux and tumor volume defined by MRI was significant ( $p < 0.0001$ ,  $R^2=0.6529$ )

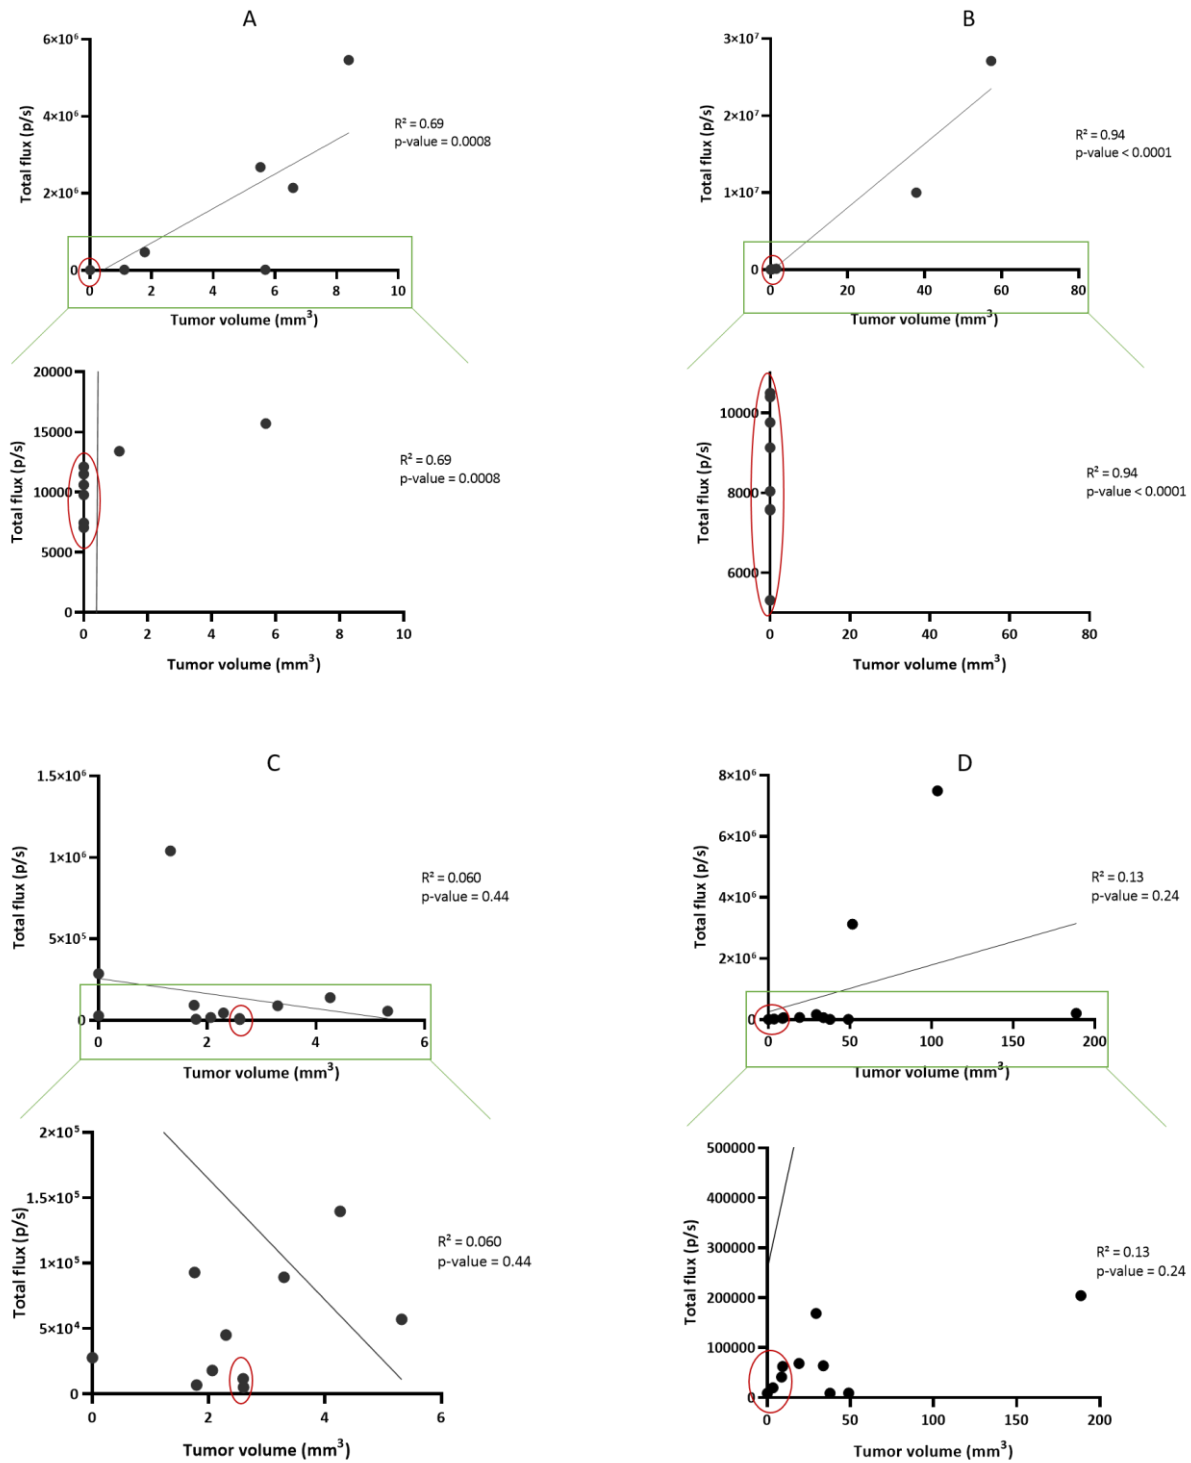

**Figure S4. Extended Figure 8 with zoom on the region low light radiance flux.** Correlation between the total flux (measured by bioluminescence imaging) and the tumor volume (measured by magnetic resonance imaging) in the GL261-luc mouse model (left panel) on Day 10 (A) and D20 (B) and the GL261-luc-GFP mouse model (right panel) on Day 11 (C) and Day 21 (D).  $n=12$  mice in each model. Statistical analyses were performed using simple linear regression. An enlargement of on the region with low light radiance flux is presented for each panel,
